# Supplementary material for: Carbon nanotube-based QuEChERS extraction and enhanced product ion scan-assisted confirmation of multi-pesticide residue in dried tangerine peel
Source: Royal Society of Chemistry journal article supplement (doi:10.1039/c5ra15348d), 2015-01-01
Supplement: c5ra15348d1.pdf [file c5ra15348d1.pdf]

## Supplementary Information

### **Carbon Nanotubes-Based QuEChERS Extraction and Enhanced Product Ion Scan-Assisted Confirmation of Multi-Pesticide Residue in Dried Tangerine Peel**

Xiaowen Dou<sup>a</sup>, Xianfeng Chu<sup>a</sup>, Weijun Kong<sup>a</sup>, Yinhui Yang<sup>a</sup>, Meihua Yang<sup>a,b</sup>

<sup>a</sup> *Institute of Medicinal Plant Development, Chinese Academy of Medical Sciences & Peking Union Medical College, Beijing 100193, China*

<sup>b</sup> *Hainan Branch Institute of Medicinal Plant Development, Chinese Academy of Medicinal Sciences & Peking Union Medical College, Wanning 571533, Hainan, China*

**Table S1** Method validation results including linearity, LOD and LOQ, precision ( $n=3$ ), recovery (%) and relative standard deviation (RSD, %) of dried tangerine peel fortified with 10, 50, 100 and 500 $\mu\text{g}\cdot\text{kg}^{-1}$  ( $n=3$ , respectively).

| Pesticide<br>( <i>n</i> =104) | Linearity                                   |          | LOQ<br>( $\mu\text{g}\cdot\text{kg}^{-1}$ ) | LOD<br>( $\mu\text{g}\cdot\text{kg}^{-1}$ ) | Precision      |      | Recovery% ( <i>RSD</i> %)( <i>n</i> =3) |                                    |                                     |                                     |
|-------------------------------|---------------------------------------------|----------|---------------------------------------------|---------------------------------------------|----------------|------|-----------------------------------------|------------------------------------|-------------------------------------|-------------------------------------|
|                               | Range<br>( $\text{ng}\cdot\text{mL}^{-1}$ ) | <i>r</i> |                                             |                                             | <i>RSD</i> (%) |      | $10\mu\text{g}\cdot\text{kg}^{-1}$      | $50\mu\text{g}\cdot\text{kg}^{-1}$ | $100\mu\text{g}\cdot\text{kg}^{-1}$ | $500\mu\text{g}\cdot\text{kg}^{-1}$ |
|                               |                                             |          | Intra-day                                   | Inter-day                                   |                |      |                                         |                                    |                                     |                                     |
| Carbendazim                   | 1~200                                       | 0.9964   | 1                                           | 0.4                                         | 6.6            | 9.1  | 79.3(3.0)                               | 83.0(8.1)                          | 90.5(9.0)                           | 95.8(6.3)                           |
| Thiabendazole                 | 1~100                                       | 0.9979   | 5                                           | 2                                           | 2.8            | 5.4  | 63.9(15.0)                              | 64.4(4.1)                          | 74.4(5.0)                           | 80.8(4.4)                           |
| Thiophanate-methyl            | 1~50                                        | 0.9938   | 1                                           | 0.4                                         | 8.3            | 3.2  | 96.3(7.4)                               | 97.9(4.5)                          | 72.8(7.4)                           | 90.0(2.7)                           |
| Chlorfluazuron                | 2~200                                       | 0.9996   | 5                                           | 0.2                                         | 2.1            | 6.1  | 104.1(6.4)                              | 79.5(3.0)                          | 97.9(6.4)                           | 91.3(5.2)                           |
| Flufenoxuron                  | 2~200                                       | 0.9987   | 5                                           | 2                                           | 1.9            | 3.2  | 117.0(3.8)                              | 110.8(7.3)                         | 79.5(3.8)                           | 94.7(11.1)                          |
| Hexaflumuron                  | 50~200                                      | 0.9743   | 10                                          | 4                                           | 2.5            | 13.4 | 68.0(6.1)                               | 69.8(8.4)                          | 74.7(6.1)                           | 70.8(5.2)                           |
| Teflubenzuron                 | 10~200                                      | 0.9975   | 5                                           | 2                                           | 10.8           | 9.3  | 64.7(3.9)                               | 66.7(8.3)                          | 89.5(3.9)                           | 105.7(3.8)                          |
| Triflumuron                   | 10~200                                      | 0.9992   | 50                                          | 20                                          | 2.6            | 3.9  | 109.7(2.0)                              | 110.0(3.6)                         | 91.0(5.0)                           | 97.2(6.6)                           |
| Aldicarb                      | 20~200                                      | 0.9975   | 5                                           | 2                                           | 1.9            | 6.9  | 74.7(14.0)                              | 103.7(9.3)                         | 102.1(3.6)                          | 97.9(4.4)                           |
| Aldicarb-sulfone              | 20~200                                      | 0.9997   | 10                                          | 4                                           | 5.6            | 0.9  | 71.5(13.6)                              | 80.7(5.5)                          | 85.0(4.0)                           | 90.9(2.4)                           |
| Bendiocarb                    | 5~200                                       | 0.9991   | 5                                           | 2                                           | 4.6            | 15.9 | 100.7(3.2)                              | 109.8(8.3)                         | 90.3(3.2)                           | 95.6(3.2)                           |
| Carbaryl                      | 5~100                                       | 0.9995   | 5                                           | 2                                           | 9.6            | 11.2 | 79.9(5.2)                               | 71.1(15.0)                         | 79.3(5.2)                           | 93.0(10.8)                          |
| Carbofuran                    | 0.1~100                                     | 1.0000   | 1                                           | 0.4                                         | 1.2            | 0.7  | 117.2(1.9)                              | 104.7(7.4)                         | 85.3(6.9)                           | 97.4(5.8)                           |
| Carbosulfan                   | 5~100                                       | 0.9996   | 0.5                                         | 0.2                                         | 6.8            | 12.1 | 79.9(3.2)                               | 113.4(8.9)                         | 88.2(3.2)                           | 104.7(6.9)                          |
| Fenobucarb                    | 5~200                                       | 0.9999   | 5                                           | 2                                           | 3.8            | 1.2  | 78.7(2.9)                               | 77.5(8.8)                          | 71.9(2.9)                           | 95.9(6.2)                           |
| Furathiocarb                  | 1~100                                       | 0.9964   | 0.5                                         | 0.4                                         | 1.1            | 7.5  | 95.0(1.4)                               | 99.3(8.5)                          | 82.3(5.4)                           | 98.0(3.7)                           |
| Indoxacarb                    | 10~200                                      | 1.0000   | 5                                           | 2                                           | 2.5            | 6.2  | 88.9(14.8)                              | 108.6(5.9)                         | 84.8(7.8)                           | 81.0(8.3)                           |
| Isoprocarb                    | 5~200                                       | 0.9999   | 5                                           | 0.2                                         | 12.2           | 5.2  | 111.8(1.9)                              | 89.6(14.7)                         | 101.5(1.9)                          | 102.8(7.9)                          |
| Methiocarb                    | 10~200                                      | 0.9999   | 10                                          | 4                                           | 14.0           | 10.0 | 72.3(18.1)                              | 75.3(13.9)                         | 81.1(11.8)                          | 116.4(12.8)                         |
| Methomyl                      | 20~200                                      | 0.9999   | 10                                          | 4                                           | 1.9            | 5.4  | 68.7(1.6)                               | 69.4(13.3)                         | 99.0(1.6)                           | 84.6(4.9)                           |
| Metolcarb                     | 10~200                                      | 0.9997   | 20                                          | 8                                           | 7.8            | 10.1 | 90.9(15.6)                              | 96.9(2.2)                          | 73.0(11.6)                          | 76.8(6.8)                           |
| Oxamyl                        | 10~200                                      | 0.9999   | 10                                          | 4                                           | 13.9           | 6.8  | 79.4(11.1)                              | 112.1(7.5)                         | 77.7(11.1)                          | 81.8(15.5)                          |
| Pirimicarb                    | 1~100                                       | 1.0000   | 5                                           | 2                                           | 2.8            | 6.9  | 71.5(4.2)                               | 72.0(4.0)                          | 84.9(4.2)                           | 94.3(4.4)                           |
| Propoxur                      | 5~200                                       | 1.0000   | 2                                           | 0.8                                         | 9.8            | 7.3  | 104.4(6.8)                              | 79.8(15.9)                         | 109.0(6.8)                          | 90.8(10.8)                          |
| Thiodicarb                    | 1~200                                       | 0.9988   | 2                                           | 0.8                                         | 0.8            | 19.6 | 76.4(6.8)                               | 99.9(10.1)                         | 83.3(6.7)                           | 99.0(8.9)                           |
| Diethofencarb                 | 2~200                                       | 1.0000   | 5                                           | 2                                           | 6.5            | 2.7  | 101.3(5.1)                              | 106.4(5.8)                         | 101.0(5.1)                          | 107.4(3.6)                          |
| Acephate                      | 20~200                                      | 0.9992   | 10                                          | 4                                           | 15.3           | 7.8  | 86.2(9.7)                               | 80.9(14.3)                         | 87.9(4.0)                           | 114.8(4.8)                          |
| Azinphos-ethyl                | 5~200                                       | 0.9994   | 10                                          | 4                                           | 1.5            | 15.5 | 107.7(8.3)                              | 87.2(15.0)                         | 80.9(9.7)                           | 112.5(10.5)                         |
| Azinphos-methyl               | 5~200                                       | 0.9995   | 20                                          | 8                                           | 11.8           | 14.2 | 73.6(13.9)                              | 76.3(4.3)                          | 75.1(5.9)                           | 110.7(6.0)                          |
| Chlorfenvinphos               | 2~200                                       | 0.9999   | 10                                          | 20                                          | 1.6            | 7.9  | 103.6(7.7)                              | 103.7(3.9)                         | 84.9(8.3)                           | 111.5(17.2)                         |
| Chlorpyrifos                  | 1~100                                       | 0.9994   | 0.5                                         | 0.2                                         | 7.1            | 7.0  | 74.2(8.8)                               | 97.2(2.6)                          | 76.9(7.7)                           | 88.3(2.5)                           |
| Chlorpyrifos-methyl           | 20~200                                      | 0.9992   | 100                                         | 40                                          | 1.4            | 8.4  | 76.3(13.4)                              | 113.9(2.0)                         | 74.2(8.8)                           | 89.9(2.7)                           |
| Coumaphos                     | 10~200                                      | 1.0000   | 20                                          | 8                                           | 1.4            | 5.7  | 113.1(16.2)                             | 104.2(15.1)                        | 74.4(13.4)                          | 78.3(5.8)                           |
| Demeton                       | 1~200                                       | 0.9977   | 5                                           | 2                                           | 0.7            | 13.6 | 91.8(5.9)                               | 106.2(2.9)                         | 78.3(7.2)                           | 108.8(8.7)                          |
| Diazinon                      | 0.5~100                                     | 1.0000   | 2                                           | 0.8                                         | 7.5            | 6.0  | 81.5(4.1)                               | 110.8(6.0)                         | 84.9(10.9)                          | 94.4(3.4)                           |
| Dichlofenthion                | 10~200                                      | 1.0000   | 20                                          | 8                                           | 4.4            | 7.7  | 116.0(11.4)                             | 96.9(7.2)                          | 78.7(4.1)                           | 85.1(14.4)                          |
| Dichlorvos                    | 10~200                                      | 1.0000   | 10                                          | 4                                           | 0.3            | 1.0  | 95.9(1.4)                               | 79.8(2.2)                          | 89.8(11.4)                          | 102.0(10.5)                         |
| Dicrotophos                   | 1~200                                       | 0.9997   | 5                                           | 2                                           | 5.9            | 2.5  | 90.2(1.6)                               | 78.2(10.6)                         | 76.6(6.4)                           | 75.1(3.0)                           |
| Dimethoate                    | 1~200                                       | 0.9974   | 5                                           | 2                                           | 5.2            | 9.8  | 83.3(4.7)                               | 110.6(8.9)                         | 73.7(7.6)                           | 106.9(7.3)                          |
| Disulfoton                    | 5~200                                       | 0.9993   | 10                                          | 4                                           | 2.6            | 14.4 | 78.5(2.6)                               | 71.2(7.1)                          | 97.4(4.7)                           | 96.4(12.9)                          |
| Ethion                        | 0.5~200                                     | 0.9995   | 2                                           | 0.8                                         | 1.0            | 5.1  | 103.3(7.5)                              | 97.7(7.8)                          | 75.7(5.6)                           | 101.1(2.8)                          |

|                       |         |        |     |     |      |      |             |             |            |             |
|-----------------------|---------|--------|-----|-----|------|------|-------------|-------------|------------|-------------|
| Ethoprophos           | 2~200   | 1.0000 | 5   | 2   | 3.5  | 5.2  | 71.9(9.6)   | 109.2(8.6)  | 101.6(7.8) | 114.6(14.8) |
| Etrinfos              | 1~200   | 0.9999 | 5   | 2   | 2.2  | 6.0  | 117.6(9.2)  | 100.9(6.2)  | 99.6(9.6)  | 113.9(4.8)  |
| Fenamiphos            | 1~200   | 1.0000 | 5   | 2   | 3.4  | 13.4 | 108.5(8.2)  | 90.8(10.6)  | 103.4(9.2) | 112.3(12.1) |
| Fenitrothion          | 20~200  | 0.9996 | 100 | 40  | 2.1  | 2.2  | 86.4(13.0)  | 80.4(6.8)   | 80.0(8.2)  | 94.6(5.8)   |
| Fensulfothion         | 2~200   | 0.9989 | 2   | 0.8 | 5.3  | 10.1 | 102.0(12.8) | 75.9(7.8)   | 109.1(3.3) | 75.5(4.4)   |
| Fenthion              | 10~200  | 0.9999 | 10  | 4   | 6.7  | 8.0  | 110.2(9.7)  | 76.9(4.4)   | 73.4(7.0)  | 83.2(10.3)  |
| Fonofos               | 5~200   | 0.9991 | 10  | 4   | 1.1  | 5.9  | 110.5(13.2) | 100.5(7.9)  | 103.9(9.8) | 83.0(4.4)   |
| Isazophos             | 1~200   | 0.9999 | 5   | 2   | 0.2  | 13.1 | 95.4(3.3)   | 98.5(12.0)  | 90.7(10.7) | 104.8(6.9)  |
| Isocarbophos          | 20~200  | 0.9999 | 50  | 20  | 8.3  | 90.1 | 67.7(8.9)   | 98.5(8.4)   | 89.4(13.2) | 113.5(7.0)  |
| Isofenphos-<br>methyl | 1~200   | 0.9937 | 2   | 0.8 | 9.6  | 10.0 | 105.7(5.9)  | 72.4(9.1)   | 71.7(3.3)  | 100.8(3.3)  |
| Malaoxon              | 5~200   | 0.9989 | 10  | 4   | 2.4  | 16.9 | 99.6(5.6)   | 79.0(10.4)  | 75.2(8.9)  | 100.8(7.2)  |
| Malathion             | 1~100   | 0.9987 | 1   | 0.4 | 8.9  | 4.0  | 105.1(12.2) | 101.6(5.6)  | 76.7(4.6)  | 84.1(3.9)   |
| Methacrifos           | 20~200  | 0.9976 | 50  | 20  | 2.9  | 12.1 | 78.1(2.6)   | 71.1(3.1)   | 77.0(5.6)  | 96.4(4.3)   |
| Methamidophos         | 5~100   | 0.9960 | 10  | 4   | 14.8 | 15.9 | 102.1(14.6) | 71.7(13.8)  | 73.1(12.2) | 80.7(3.5)   |
| Methidathion          | 0.2~200 | 0.9994 | 1   | 0.4 | 2.1  | 4.8  | 71.8(3.9)   | 77.7(9.1)   | 87.1(2.6)  | 99.4(7.4)   |
| Mevinphos             | 5~200   | 0.9970 | 10  | 4   | 5.5  | 8.0  | 102.4(6.3)  | 90.7(12.3)  | 71.8(4.6)  | 109.3(4.6)  |
| Monocrotophos         | 10~200  | 0.9986 | 10  | 4   | 1.0  | 3.6  | 97.0(2.6)   | 98.4(4.1)   | 74.7(3.9)  | 96.4(6.2)   |
| Omethoate             | 20~200  | 0.9991 | 10  | 4   | 18.9 | 0.4  | 102.5(1.6)  | 115.5(6.9)  | 88.7(6.3)  | 94.3(7.7)   |
| Parathion             | 20~200  | 0.9998 | 50  | 20  | 1.2  | 1.9  | 80.1(14.2)  | 79.9(5.2)   | 77.2(3.6)  | 71.2(2.9)   |
| Phenthoate            | 20~200  | 0.9998 | 100 | 40  | 9.2  | 5.3  | 71.8(4.8)   | 75.4(16.0)  | 76.9(6.2)  | 80.5(8.1)   |
| Phorate               | 5~200   | 0.9988 | 10  | 4   | 2.4  | 6.8  | 93.0(7.9)   | 85.6(4.4)   | 89.1(7.2)  | 87.8(6.8)   |
| Phorate-sulfone       | 0.5~100 | 0.9999 | 2   | 1   | 2.9  | 2.5  | 84.2(9.9)   | 88.3(7.1)   | 71.7(4.8)  | 72.7(3.0)   |
| Phorate-sulfoxide     | 1~200   | 0.9999 | 5   | 1   | 7.4  | 5.3  | 75.0(5.3)   | 76.3(11.0)  | 72.5(7.9)  | 92.8(5.1)   |
| Phosalone             | 5~200   | 0.9997 | 5   | 2   | 5.1  | 6.6  | 92.5(10.7)  | 87.8(8.8)   | 83.5(9.9)  | 85.9(2.2)   |
| Phosfolan             | 0.5~100 | 1.0000 | 2   | 0.8 | 0.5  | 7.1  | 90.2(6.2)   | 115.0(2.7)  | 75.6(5.3)  | 91.6(4.5)   |
| Phosmet               | 10~200  | 0.9999 | 20  | 8   | 14.8 | 74.9 | 100.0(2.3)  | 110.5(9.2)  | 81.7(10.7) | 96.8(5.5)   |
| Phosphamidon          | 2~200   | 0.9916 | 1   | 0.4 | 0.4  | 8.4  | 94.4(6.5)   | 103.9(15.7) | 71.2(6.2)  | 91.2(7.3)   |
| Phoxim                | 2~200   | 0.9999 | 10  | 5   | 8.0  | 10.2 | 105.7(1.5)  | 86.8(7.1)   | 109.5(7.3) | 97.9(6.2)   |
| Pirimiphos-ethyl      | 1~100   | 0.9998 | 1   | 0.4 | 1.0  | 4.2  | 107.2(1.9)  | 85.8(2.7)   | 82.9(6.5)  | 102.7(4.1)  |
| Pirimiphos-<br>methyl | 1~100   | 1.0000 | 2   | 0.8 | 2.3  | 7.3  | 100.9(1.7)  | 84.9(10.0)  | 88.7(11.5) | 97.7(3.9)   |
| Profenofos            | 2~200   | 0.9999 | 5   | 2   | 12.2 | 6.9  | 110.3(1.4)  | 102.1(10.8) | 91.4(8.9)  | 98.1(4.9)   |
| Propetamphos          | 10~200  | 0.9993 | 20  | 8   | 4.6  | 5.6  | 82.4(15.2)  | 74.2(11.5)  | 83.0(7.7)  | 114.0(6.4)  |
| Quinalphos            | 2~200   | 0.9974 | 10  | 4   | 7.3  | 10.8 | 101.7(10.2) | 111.9(14.1) | 94.7(12.4) | 86.6(13.0)  |
| Sulfotep              | 1~100   | 0.9993 | 5   | 2   | 13.9 | 7.7  | 112.1(13.5) | 101.4(11.0) | 71.4(15.2) | 82.6(11.6)  |
| Terbufos              | 5~200   | 1.0000 | 5   | 2   | 6.9  | 14.3 | 83.8(17.0)  | 94.5(7.9)   | 71.2(10.2) | 78.6(13.8)  |
| Tetrachlorvinphos     | 5~200   | 0.9993 | 5   | 2   | 9.0  | 3.8  | 88.6(14.2)  | 79.8(10.0)  | 81.2(13.5) | 81.8(8.1)   |
| Triazophos            | 0.5~100 | 1.0000 | 1   | 0.4 | 4.9  | 5.3  | 91.7(5.1)   | 93.0(4.0)   | 96.7(7.0)  | 107.5(5.1)  |
| Trichlorfon           | 20~200  | 0.9993 | 10  | 4   | 4.5  | 5.9  | 73.5(4.7)   | 76.0(3.5)   | 79.7(14.2) | 85.3(8.5)   |
| Ditalimfos            | 2~200   | 1.0000 | 10  | 4   | 0.2  | 11.9 | 91.4(4.2)   | 117.6(5.1)  | 84.5(5.1)  | 106.1(6.1)  |
| Iprobenfos            | 2~200   | 0.9952 | 5   | 2   | 2.2  | 5.7  | 81.6(3.2)   | 82.4(7.0)   | 85.9(4.7)  | 104.6(2.6)  |
| Pyrazophos            | 5~200   | 0.9971 | 10  | 4   | 4.4  | 12.4 | 80.0(9.3)   | 108.0(11.5) | 74.6(4.2)  | 114.0(6.4)  |
| Tolclofos-methyl      | 20~200  | 1.0000 | 50  | 20  | 1.3  | 2.2  | 94.2(4.1)   | 83.2(3.6)   | 109.6(3.2) | 94.4(2.3)   |

|                |         |        |     |     |      |      |             |            |             |             |
|----------------|---------|--------|-----|-----|------|------|-------------|------------|-------------|-------------|
| Acetamiprid    | 0.2~100 | 0.9959 | 2   | 0.8 | 1.9  | 0.1  | 83.1(8.4)   | 100.7(5.5) | 81.2(9.3)   | 112.7(5.7)  |
| Imidacloprid   | 1~200   | 0.9980 | 5   | 2   | 1.0  | 4.0  | 96.5(12.4)  | 116.8(3.9) | 85.0(4.1)   | 83.9(4.2)   |
| Pymetrozine    | 5~200   | 0.9996 | 5   | 2   | 12.2 | 9.1  | 75.7(11.3)  | 90.8(10.5) | 99.9(8.4)   | 107.4(13.1) |
| Tebufofenozid  | 20~200  | 0.9972 | 100 | 40  | 10.0 | 5.1  | 112.3(2.4)  | 82.2(10.9) | 81.9(12.4)  | 103.4(2.5)  |
| Azoxystrobin   | 0.5~100 | 0.9997 | 1   | 0.4 | 4.2  | 1.1  | 86.6(5.5)   | 89.3(6.8)  | 72.4(11.3)  | 108.1(9.5)  |
| Isoprothiolan  | 2~100   | 1.0000 | 5   | 2   | 3.4  | 4.1  | 79.5(11.3)  | 95.6(13.8) | 87.1(2.4)   | 115.5(8.2)  |
| metalaxyl      | 0.2~100 | 1.0000 | 1   | 0.4 | 3.4  | 3.5  | 72.1(12.1)  | 102.0(8.0) | 88.6(5.5)   | 84.2(10.1)  |
| Triflumizol    | 1~200   | 0.9999 | 5   | 2   | 5.2  | 7.9  | 98.2(7.4)   | 99.1(3.2)  | 110.7(11.3) | 111.1(16.1) |
| Bitertanol     | 10~200  | 0.9999 | 10  | 4   | 9.2  | 15.3 | 92.1(7.0)   | 72.0(16.9) | 78.9(14.4)  | 110.5(11.3) |
| Difenoconazole | 2~100   | 0.9991 | 5   | 2   | 4.3  | 10.8 | 86.9(2.6)   | 95.6(14.6) | 86.2(5.7)   | 103.8(6.9)  |
| Diniconazole   | 1~200   | 0.9997 | 5   | 2   | 1.2  | 4.1  | 86.3(5.0)   | 79.9(5.4)  | 99.2(7.0)   | 101.5(3.0)  |
| Flusilazole    | 1~200   | 0.9976 | 5   | 2   | 6.4  | 5.4  | 78.4(8.8)   | 71.3(9.6)  | 75.1(4.6)   | 88.3(5.1)   |
| Flutriafol     | 1~200   | 0.9990 | 1   | 0.4 | 0.7  | 8.0  | 73.1(1.7)   | 98.9(7.0)  | 78.3(8.3)   | 102.5(4.4)  |
| Hexaconazole   | 5~200   | 0.9999 | 5   | 2   | 1.2  | 7.7  | 76.9(5.3)   | 111.4(6.2) | 94.8(8.8)   | 98.2(6.2)   |
| Myclobutanil   | 1~200   | 0.9998 | 5   | 2   | 2.8  | 3.2  | 92.9(2.2)   | 76.9(7.0)  | 74.6(6.7)   | 101.7(5.9)  |
| Penconazole    | 2~200   | 0.9997 | 10  | 4   | 3.3  | 3.3  | 83.7(1.4)   | 74.4(6.2)  | 73.2(8.3)   | 101.7(9.9)  |
| Propiconazole  | 2~200   | 1.0000 | 10  | 4   | 4.0  | 8.7  | 103.4(11.7) | 76.5(7.5)  | 101.6(9.2)  | 84.7(6.4)   |
| Tebuconazole   | 1~200   | 0.9995 | 1   | 0.4 | 2.2  | 4.9  | 72.4(14.9)  | 79.6(9.9)  | 71.3(8.2)   | 113.6(7.1)  |
| Triazolone     | 2~200   | 0.9941 | 10  | 4   | 7.3  | 10.5 | 102.9(13.2) | 72.0(8.8)  | 71.9(11.7)  | 82.9(5.6)   |
| Triadimenol    | 10~200  | 0.9996 | 10  | 4   | 5.7  | 8.4  | 96.2(6.9)   | 108.7(7.6) | 80.8(6.9)   | 110.3(8.5)  |
| Fenprothrin    | 2~200   | 0.9999 | 5   | 2   | 1.5  | 6.9  | 73.6(7.8)   | 80.4(1.4)  | 78.1(7.4)   | 98.9(4.8)   |
